# Supplementary material for: Assessment of the effectiveness of Payment for Ecosystem Services (PES) in the delivery of desired Ecosystem Services in Sasumua catchment, Kenya
Source: Copernicus journal article supplement (doi:10.5194/hess-2016-541), 2016-11-29
Supplement: Supplementary file [file hess-2016-541-AC1-supplement.pdf]

# Assessment of the effectiveness of Payment for Ecosystem Services (PES) in the delivery of desired Ecosystem Services in Sasumua catchment, Kenya

Charles Nduhiu<sup>1</sup>, John Mwangi Gathenya<sup>1</sup>, John Kimani Mwangi<sup>2</sup>, Malik Aman<sup>3</sup> and Titus Mutisya<sup>3</sup>

<sup>1</sup>Department of Soil, Water and Environmental Engineering, Jomo Kenyatta University of Agriculture and Technology, Nairobi, Kenya

<sup>2</sup>Department of Civil Construction and Environmental Engineering, Jomo Kenyatta University of Agriculture and Technology, Nairobi, Kenya

<sup>3</sup>Kenya Agricultural Productivity and Sustainable Land Management Program, Ministry of Environment, Natural Resources and Regional Development Authorities Nairobi, Kenya

Correspondence to: Charles Nduhiu ([nduhiucharles@gmail.com](mailto:nduhiucharles@gmail.com))

**Abstract.** The study was conducted in Sasumua watershed in Nyandarua County, Kenya where a Payment for Ecosystem Services (PES) pilot project was initiated in June 2015 with the aim of promoting sustainable land management practices (SLM) that would lead to improved water quality. The paper describes the PES concept implemented in the Sasumua watershed. A representative sub-watershed was selected whereby 42.3 ha were under intensive cultivation to monitor and model the effect of sustainable land management practices on soil erosion – a reflection of what is happening under the PES scheme. Total Suspended Solids (TSS) was selected as a proxy indicator of water quality in this study. The conditions (SLM status and water quality status) before PES scheme are assumed as conditions under conventional approach. (*Assumption: Farmers would still be under these conditions today if no alternative was provided*). Data on status of SLM adoption and TSS were determined before onset of PES pilot project to represent status of water quality under ‘norm’ conditions. The conditions after one year of PES pilot project are assumed as improved conditions achieved under PES tool – as an alternative approach. The conditions observed after one year suggest improved conditions achieved under an alternative approach. The increased adoption of SLM technologies are attributed to the PES scheme implemented in the watershed. Fitting of the TSS observed before and after one year of PES scheme in the SWAT simulation suggest a positive trend towards the desired ecosystem. It is evidently clear that best conditions of a watershed cannot be realised if farmers are left to continue under the ‘norm’ conditions. Alternative approaches to watershed management are inevitable. The SWAT model predicts that the TSS would reduce to its desired status if the representative sub-watershed is managed to its best scenario. These conditions can only be realized if all farmers implement SLM technologies as recommended. Incentives provided by the PES scheme can lead to full implementation of the land management plans – thus, reduced sediments. It was established that adoption of SLM technologies through conventional approach stood at 11% before the onset of PES scheme. However, remarkable changes were observed after one year of PES project implementation where the SLM adoption improved from 11% to 32% within the first year. PES scheme is identified as an effective approach in accelerating sustainable land management practices which can lead to improved conditions downstream. However, long term research data is highly recommended to validate the effectiveness of PES over number of years especially on ecosystem services that manifest after long periods and establishing whether PES incentives actually maintain best conditions at farm level. More ecosystem services should also be monitored to validate the TSS results.

**Key words:** Payment, Ecosystem Services, Sustainable Land Management, water quality,

## 1 Introduction

Over the past 50 years, humans have changed ecosystems more rapidly and extensively than in any comparable period of time in human history, largely to meet rapidly growing demands for food, fresh water, timber, fibre, and fuel etc (MEA, 2005) which has resulted in a substantial and largely irreversible loss in diversity of life on Earth.

5 Healthy watersheds provide valuable services to society, including supply and purification of fresh water. With population and development pressures leading to rapid modification of watersheds, valuable hydrological services are being lost which poses risks to quality of drinking water and reliability of water supplies (Sandra, *et al.*, 2005). As watersheds determine water flows, they are appropriate areas for organizing planning and management of Ecosystem Services (ES) downstream (Smith, *et al.* 2006).

10 Adoption of sustainable land management (SLM) technologies by upstream farmers can improve ecosystem services in form of improved water quality to downstream users. PES approach has been proven to provide desired ecosystem services (Pagiola, 2008;Porras *et al.*, 2013;). SLM practices are critical in reducing chemical and sediment pollution, improve rainwater retention, ground water recharge, regulate flows and wetland functions and reduce risk of floods and landslides. However, farmers are unable to adopt good land practices due to lack of  
15 knowledge and financial resources. Several studies have reported slow uptake of sustainable land management practices through conventional approaches. (FAO, 2010) reported that adoption of SLM technologies has been relatively low globally. (World Bank, 2010) reported that adoption of SLM technologies in sub-Saharan Africa was very low-about 3% of total crop land. (Kihuu, 2016) estimated that in Kenya, the adoption rates of sustainable land management (SLM) practices in areas where SLM practices are highly needed (dry lands) due to unfavourable  
20 conditions are alarmingly low estimated at 14.2%, despite the declining productivity of these ecosystems. Even though there is insufficient research done on adoption rates in all agro-climatic zones of Kenya, this value could be lower in semi-humid to humid zones as studies have reported that where lands are relatively productive, there is widespread apathy among small scale farmers to invest in SLM technologies as the perceived net gain is minimal (Sterve, 2010;Molua, 2014;Kirui, 2016).

25 Other studies report a generally low adoption or no adoption at all in Kenya through conventional approaches (Shiferaw *et al.*, 2009;World Bank, 2008;Branca *et al.*, 2011;Liniger *et al.*, 2011;MOA & MOE, 2011; Jairo, 2013;Tanui *et al.*, 2014;Mulinge, *et al.*, 2016;). Reward mechanisms such as Payment for Ecosystem Services (PES) that accelerate adoption rates through provision of incentives (Porras *et al.*, 2013) are the alternative to the conventional approaches as incentives are highly likely to increase rate of SLM adoption by small scale farmers.

30 The Soil and Water Assessment Tool (SWAT) predicts the impact of land management practices on water, sediment, and agricultural chemical yields in watersheds with varying soils, land use, and management conditions over time (Arnold *et al.*, 1998). The continuous-time, process-based model requires specific information about weather, soil properties, topography, vegetation, presence of ponds or reservoirs, groundwater, the main channel, and land management practices (Bracmort *et al.* , 2006). SWAT model has been applied in several studies to quantify  
35 effects of Sustainable Land management practices to water quality downstream (Bracmort *et al.*, 2006; Cau & Paniconi, 2007;Gitau *et al.*, 2008;Kieser, 2008;Mbonimpa *et al.*, 2012).

Payments for environmental services (PES) are a class of economic instruments designed to provide incentives to land users to continue supplying an environmental service that is benefiting society more broadly. Payments may be made to land users to adopt land use practices that will produce the required service from scratch (e.g. planting grass  
40 filters for buffering sediments loads). (Wunder Sven, 2005)defined PES as a voluntary transaction in which a well-defined environmental service (ES), or a form of land use likely to secure that service is bought by at least one ES buyer from a minimum of one ES provider if and only if the provider continues to supply that service.

This study was established under the pilot project to assess the effectiveness of PES scheme in the delivery of desired ecosystem services in Sasumua catchment. The paper describes the PES concept implemented in the  
45 Sasumua watershed. A representative sub-watershed was also selected to model and predict the effect of sustainable land management practices on soil erosion – a reflection of what is happening under the PES scheme.

## 2 Materials and Methods

### 2.1 Site description

Sasumua is located in Central Kenya, southern ridges of Kenya's Aberdare Mountains about 90 km northwest of Nairobi, at an altitude of 2200-3850 m.a.s.l. Mean annual rainfall is 1000-1600 mm, peaking March-May and October-December in a binomial pattern (Gathenya *et al.*, 2010). The catchment of the Sasumua reservoir is 107 km<sup>2</sup> and comprises three sub-catchments: Sasumua (67.44 km<sup>2</sup>) Chania (20.23 km<sup>2</sup>) and Kiburu (19.30 km<sup>2</sup>).

A representative sub-watershed was strategically selected in a way possible to correlate the SLM adoption to water quality improvement – headwater sub-watershed. It was difficult to monitor all PES farmers in the larger Sasumua watershed given time and the resources available. With a small sub-watershed, it was practicable to follow the progress of every farmer. The headwater sub-watershed is approximately 6.08km<sup>2</sup> with a total of 41 farmers engaged in PES pilot project. The selection was strategic such that all farmers had the same outlet point for monitoring reduction in sediments loads as they adopt new SLM practices (figure 1). Furthermore, the choice of a headwater ensured there were no interferences on the downstream results by upstream activities allowing a direct relationship of the water quality status to the actual progress made on adoption of new SLM technologies.

### 2.2. KAPSLMP PES pilot project

KAPSLMP PES pilot project is a public scheme where the government represented by Kenya Agricultural Productivity and Sustainable Land Management Project (KAPSLM) is buying Ecosystem services as a dummy ES buyer. Table 1 shows chronology of KAPSLMP PES project implementation in Sasumua watershed. In June 2015, Kenya Agricultural and productivity and Sustainable Land Management Project (KAPSLMP) initiated a PES pilot project in Sasumua. This was to actualize '*theory into practice*' from past study findings and recommendations.

It was estimated that Sasumua watershed yielded 40,934 tons of sediments per year most of which are deposited at the intakes where they cause siltation problems and in Sasumua reservoir where they increase water turbidity and thus high water treatment costs (Mwangi, 2014). In 2014, the total cost for water treatment in Sasumua was estimated at KES 30,592,640 (approximately USD 305,926) annually. This translates to a cost of KES 747 (approximately USD 7.5) per ton of sediments generated. The cost of treating water at Sasumua treatment plant was estimated at Ksh. 2,080 (USD 208) per 1,000 m<sup>3</sup> against Ksh.1,120 (USD 112) per 1,000m<sup>3</sup> at Ndakaini dam (Mwangi, 2014). This is attributed to poor raw water quality at Sasumua reservoir among other factors.

The annual costs of water purification were predicted to go up by Ksh 15,534,720 (approximately USD 155,347) by 2024 if farming practices continue as they are (PRESA, 2014). This problem can be solved by developing partnerships with land owners to implement sustainable land management practices such as terraces, contour farming, grass filter strips and grass waterways through an alternative approach. In this case PES was recommended as an alternative approach in Sasumua watershed (PRESA, 2014).

### 2.3. The goal of PES pilot project

The goal of KAPSLM PES pilot project was to demonstrate effectiveness of PES as tool in delivering desired ecosystem services in Sasumua catchment. The desired ecosystem services are improved water quality downstream as one of the provisional services of a reconstructed ecosystem. The immediate objectives were to promote pre-determined SLM technologies that would significantly reduce soil erosion in the catchment – consequently reducing the sediments downstream. The pilot project targeted hotspot areas identified in past studies (Mwangi 2014). Table 2 describes the targeted SLM technologies to be piloted by approximately 1,017 farmers in Sasumua watershed.

### 2.4. Estimated benefits from PES project in the watershed

The past studies in the Sasumua watershed found that maximum benefits in terms of soil erosion reduction will be realized only if conservation measures are targeted in the pre-identified hotspot areas. According to (Mwangi, 2014) the following were some of the expected benefits under a PES scheme:

- Implementing a grassed waterway approximately 20 kilometres long and 3 metres wide will reduce soil sedimentation by 20%.
- A combination of terraces and grassed waterways would reduce sediment inflow by 75%.
- 10 metres filter strips and grassed waterway will reduce sedimentation by 73%.
- Savings in water treatment and costs under PES were estimated to be KES 20,497,040 (approximately USD 204,970).

## 2.5. The ES buyer and sellers

KAPSLMP was acting as a dummy buyer of Ecosystem Services (ES) at the initial pilot stage. Prove of PES viability was required to enable replication and scaling up of the PES project. Therefore, assessing effectiveness of PES as an alternative approach to soil erosion control and water quality was an integral part of the KAPSLMP PES project.

The ES sellers are small scale farmers located in the hotspot areas. The PES farmers are organized into Common Interest Groups (CIGs). The CIGs include various agricultural value chains being promoted under KAPSLM project including; Tree tomato, Dairy, Irish potatoes, straw berry, Bee keeping, Agroforestry, Fish farming etc. Farmers receive trainings through the respective CIGs. At the time of this study, the KAPSLMP PES project had been implemented in an area covering approximately 762.4 hectares with a total of 1,017 PES farmers.

## 2.6. Conditions for getting payments

Land Management Plans (LMPs) were established for all PES farmers in the watershed. The SLM experts and the extension agents agreed with each farmer what measures would be implemented and supported in each farm to reduce soil erosion. Individual farmers were given a copy of an LMP in form of a map – describing areas within the farm where each type of recommended SLM technology will be implemented.

To qualify for PES payments, the farmers had to implement the SLM technologies as per specifications in the LMPs. They were also to maintain the LMPs regularly. This entailed taking care grass strips, trees, keeping the terraces stable etc. The PES program compensated 30% of the total SLMP implementation cost incurred by the farmer.

## 2.7. Training of farmers

Through the Common Interests Groups (CIGs), PES farmers received weekly training based on topics relevant to the agricultural value chains they were involved in. The aim was to promote good husbandry practices and increase production per unit area while conserving the environment. The training sessions were led by the extension service providers contracted under the KAPSLM project. The service providers were also available for consultation by the farmers. They organized on-farm demonstrations and audited the progress of SLM adoption in order to assess the compensation for each farmer.

## 2.8. Long term maintenance

In each of the 4 micro-catchments, the PES participants elected PES committee members. The PES committee worked closely with Water Resources Users Association (WRUA). WRUA are associations of water users and riparian land owners who have associated for the purposes of cooperatively sharing, managing and conserving a common water resource. WRUAs are part of catchment management strategy established under Water Act (2002) of Kenya. The PES committee members are the leaders of the PES scheme in their respective micro-catchments. They were trained on PES concept, good husbandry practices, environmental conservation etc. They were supposed to lead as examples to other farmers in all PES related activities promoted under the KAPSLM PES project. The PES committee members conducted regular on-farm checks in their respective micro-catchments to encourage adoption of SLM technologies. They represented farmers through forwarding their needs and priorities during PES stakeholder meetings. They provide a communication link between the KAPSLM PES management team and the farmers. The involvement of PES committee together with the Water Resources Users Association (WRUA) in the PES project activities was expected to maintain the farms in their desired status during and beyond the KAPSLM PES pilot project.

## 2.9. Monitoring and modelling the effect of sustainable land management practices on soil erosion

A small area was established as a representative sub-watershed to study what is happening under the PES scheme. This was to make it possible to follow the individual actions of all farmers in the study site for deeper analysis on the effect of additional SLM technologies to downstream water quality. The study site is a headwater – stretches from the forest towards cultivated lands. The headwater comprises of 3 sub-basins covering an area of 6.08 km<sup>2</sup> whereby 42.3 ha are under intensive cultivation. As shown in Fig 1, Forest is the dominant land cover for sub-basins 1 and 2 while agriculture is the dominant land cover in sub-basin 3. Table 3 shows characterization of the study site. There are a total of 67 farmers of which 41 are participating in the PES pilot project. The key point to note is that sub-division of land is high in this area, increasing the number of individuals who own land (some of whom are

‘absent farmers’<sup>1</sup>). This number (67) is estimated from the farms with title deeds and not individuals. The actual number of individuals could be higher including the ‘absent farmers’<sup>1</sup>.

The article looks at PES scheme as an alternative tool to conventional approaches in regard to SLM adoption. PES scheme incentivizes farmers to adopt and continue with certain practices away from the ‘norm’, and as a result influence the water quality status downstream. The article recognizes that most of the ecosystem services take time to manifest. Total Suspended Solids (TSS) was selected as a proxy indicator as any immediate change on erosion (e.g terraces/retention ditches trapping sediments) will be detected if reference data is available (baseline data).

The conditions (SLM status and water quality status) before PES scheme are assumed as conditions under conventional approach. (*Assumption: Farmers would still be under these conditions today if no alternative was provided*). Data on status of SLM adoption and TSS were determined before onset of PES pilot project to represent status of water quality under ‘norm’ conditions. The conditions after one year of PES pilot project are assumed as improved conditions achieved under PES scheme – as an alternative approach. It should be noted that PES scheme is a continuous project and the results presented are those monitored in the first year.

Since long term data was not available over a considerable period (e.g hydrology data of over 20 years), this study adopted SWAT model to establish a model-system of the study site. This was done through developing best and worst scenarios. This allowed fitting field measurements in between best and worst scenarios to help determine the inclination of the observed scenarios – whether positive towards the target scenario or negative towards the worst scenario. The modelling in this study helps to predict what the end would look like.

#### 2.9.1. Description of SWAT Model Inputs

The most important SWAT model inputs include the digital elevation model (DEM), land use and land cover, soil information and weather data. Table 5 describes input data information. For this study, four sustainable land management practices were considered including; terracing, contouring, filter strips and strip cropping. These were based on key SLM practices being promoted by the PES pilot project in the Sasumua catchment (table 6).

#### 2.9.2. Model runs

SWAT model simulations were performed to assess the effectiveness of SLM technologies to water quality downstream by specifically checking on the Total Suspended Solids (TSS) generated in two different scenarios (best and worst scenarios). The adjusted parameters (to reflect worst and best scenarios) were obtained from different tables provided by (Arnold *et al.*, 2012) and judgement based on observation and field experience. For instance, appropriate USLE practice factor for well terraced field based on field slope are given in table 33-1 page 487 (Arnold *et al.*, 2012). Based on the slope of the study site, the appropriate P-factor is 0.18 as shown in table 6. To represent worst scenario, the P-factor was adjusted to 1 which reflects increased sediment losses (Arnold *et al.*, 2012).

Best scenario is the scenario in which the selected SLM parameters were adjusted to their best values (i.e. when highly effective in reducing soil erosion). This scenario assumes best conditions in the study site. Worst scenario is the scenario in which the selected SLM parameters were adjusted to their low values (i.e. not effective in reducing soil erosion) assuming poor conditions of SLM technologies in the study site. The scenarios before and after one year of PES project (established through actual field measurements) were fitted in between the SWAT generated scenarios (best and worst scenarios) to evaluate the effectiveness of PES scheme (Fig 2).

---

<sup>1</sup> ‘Absent farmers’ - refers to individuals who own land but do not live in rural areas. They are participating in ‘other’ income generating activities typically in urban areas.

## 2.10. Description of scenarios

**Scenario before PES-project (field observation):** This scenario was determined from actual field measurements on TSS during the rainy season of March-May 2015. This was carried out before the onset of KAPSLMP PES project to represent conditions under conventional approach. The average TSS in the three month rainy season was determined to represent conditions before PES project.

**Scenario after one year of PES project (field observation):** This scenario was also determined from actual field measurements on TSS during March-May 2016 rainy season, one year PES project implementation. The average TSS was determined to represent a scenario after one year of PES project implementation– improved conditions achieved under PES scheme.

**Best scenario (SWAT generated):** This scenario was determined by adjusting SWAT parameters (Table 6) for selected SLM technologies to their best considered status guided by literature (Arnold *et al.*, 2012) at which they are assumed to be highly effective in improving water quality downstream. All SWAT parameters are within certain ranges e.g. TERR-P ranges between 0-1. A value approaching 1 reflects increased soil loss and a value approaching 0 reflects reduced soil loss (Arnold *et al.*, 2012).

**Worst scenario (SWAT generated):** This is where expert judgement played a key role based on observation and field experience which was further supported by interpretation of parameter ranges from literature. This scenario was represented by adjusting the SWAT parameters to their worst considered status when the modelled SLM practices are assumed to be in poor state and not effective in improving water quality downstream. Table 6 shows selected SLM practices modelled in SWAT and the adjusted parameters.

## 2.11. Field observations

Baseline status on SLM technologies was established at the onset of PES pilot project in June 2015 where 41 farms were mapped and Land Management Plans (LMPs) established. These included: length in meters of grass filter strips planted, length in meters of terraces constructed and length in meters of protected riparian strip where applicable (table 7). Water samples were collected on a daily basis targeting the rainy seasons when soil erosion was expected to be high. Baseline status on TSS was carried out every 2 to 3 days - well distributed in the rainy season of March-May 2015 before the onset of PES pilot project. Water samples were tested for Total Suspended Solids (TSS) by photometric determination method using a Lovibond water quality testing kit (Tintometer Group, Bibi *et al.*, 2011). The photometric method was also correlated with the conventional gravimetric method to determine the relationship. Two V-Notches were installed in February 2016 on which daily stream flows were observed in the rainy season of March-May 2016. The observed TSS and discharge were used in SWAT calibration. Daily rainfall data was collected from the existing weather station located in Sasumua catchment (Fig 3) and managed by Nairobi City Water and Sewerage Company (NWSC) that incorporates a standard rain gauge. Fig 4 shows that the wet season of March-May 2016 had a relatively higher rainfall. Rainfall intensities were not measured in this study. Daily rainfall of minimum 25mm has been used as threshold criteria in estimating soil erosion (Xie, Liu, & Nearing, 2002). The numbers of rainfall days exceeding 30mm/day were relatively higher in the wet season of March-May 2016. Statistical comparisons were performed for rainfall and TSS results.

It should be noted that the measurement sites of TSS in sub-basins 1 and 2 (fig 1) were not the same as the sites for which the discharge was calibrated. The distances between points A and C is approximately 356 meters and point B and D is approximately 286 meters. 96.7% of sub-basins 1 and 86.4% of sub-basin 2 are forest cover. In SWAT modelling, the HRU definition used a threshold of 15% in land use percentage which resulted in Sub-basin 1 and 2 being considered as forested lands and Sub-basin 3 as an agricultural land in SWAT model. The assumption therefore is that the TSS results at points A and B are insignificantly different from TSS at C and D given the small differences in catchment size between A & C, and B & D in comparison to the catchment sizes of sub-basins 1 and 2. Again validation of TSS used actual field data collected at the main outlet (Point E) in sub-basin 3. Validation of TSS was satisfactorily with a P-factor of 0.93 and NS of 0.70.

### 3. Results and discussions

#### 3.1. Overall progress of SLM adoption

This study sought to establish the progress made by the KAPSLMP PES project in all the four micro-catchments (Kiburu, Njabini, Githabai and Mukou). The average progress was established to be 45.5% towards the targeted status (Table 2) (i.e. cumulative progress vs. the target). In general, grass strips and terraces achieved the highest achievement with 59.9% and 56.5% respectively (figure 5).

#### 3.2. Magnitude of the incentives

The PES-farmers are incentivized by a compensation of 30% of the total cost of implementing the recommended SLM technologies in their farms. The implementation is on-going with each farmer implementing his/her LMP. So far, the compensation is estimated at an average of KES 4,541 (approximately USD 45) per household. Approximately 41% of PES farmers have been evaluated and found to have implemented the SLM technologies as stipulated in the LMPs. The total estimated costs of SLM implementation by the 41% of PES farmers are estimated at KES 6,236,887 (approximately USD 62,369). At the time of this study, the PES farmers had received a compensation (30% of total costs) worth of KES 1,871,066 (approximately USD 18,711).

#### 3.3. Simulated impact of PES scheme on water quality

TSS was used as the main proxy indicator in assessing the effectiveness of PES approach. The comparison of photometric method and the conventional gravimetric method in TSS measurements showed that the relationship is linear (Fig 6). Generally, the Lovibond reads a relatively higher TSS value from that of gravimetric method with an average factor of 1.12. This means if conventional gravimetric method reads (X), the Lovibond reading can be estimated at (1.12X).

At the onset of PES pilot project, the SLM adoption status was established at 11% – these included; 820m of terraces, 120m of retention ditches, 920m of grass strips, and 210m of river bank protection (Table 7). The water quality status before the onset of the PES pilot was represented by TSS at an average of 71.05 mg/L. After one year of PES project implementation, the SLM adoption status improved to 32%; 1561m of terraces, 551m of retention ditches, 3725m of grass strips, and 510m of river bank protection. At this period, the average TSS observed was an average of 42.73 mg/L. T-test to compare seasonal rainfall of March – May 2015 and March – May 2016 showed that there were no significant differences on daily rainfall characteristics of the two seasons (Table 9). However, the reduction of TSS from 71.05 mg/L to 42.73 mg/L was identified as significant (Table 10); a result which would have not been realised if no alternative was provided.

Figure 7 shows the TSS results in the study site measured during two rain season of March-May 2015 and March-May 2016. As aforementioned, the study site is a ‘headwater’ (fig 1) – points A and B in fig 1 are bordering the forest and agricultural land. Since most of the intensive agriculture is happening below points A and B towards point E, this study used the TSS results of point E to interpret the effectiveness of PES scheme as an alternative approach in delivering the desired ecosystem services. The TSS results at point E are both contribution of the forested lands (which can be treated as ‘*nature contribution*’) and the agricultural land. From Fig 7, it is observable that TSS reduced to almost what the nature is currently contributing. This is attributed to the alternative approach provided – the PES as tool in watershed management. The PES incentives are expected to further improve and maintain the best conditions at farm level which will assure sustained delivery of the desired ecosystem services. It is paramount to note that there are undocumented few cases where farmers are practising ‘*illegal farming*’ inside the forest. This was not accounted for in this study.

The calibrated SWAT model in this study provides a model-system that allows assessment of effectiveness of PES approach in the delivery of desired ecosystem services downstream. At the onset of the PES project, the field observation of TSS was estimated at an average of 71.05mg/L. This means the PES project did not start from the worst scenario which is predicted at 124.15 mg/L by the SWAT model. Since there existed some SLM technologies through farmers own initiatives, this value of TSS observed before the onset of PES project is treated as the value under the conventional approaches – at ‘*norm*’ situations. The initial findings after one year demonstrate that an improvement on water quality had actually occurred – average TSS significantly reduced from 71.05mg/L to 42.73mg/L. The SWAT model predicts that the TSS would reduce to an average TSS of 12.76 mg/L if the representative sub-watershed is managed to its best scenario – conditions to be realized if all farmers implement the land management plans as stipulated. Figure 2 shows the simulated impact of PES scheme to water quality in the study site.

#### 4. Conclusions

The conditions observed after one year suggest improved conditions achieved under an alternative approach. The results observed in the representative sub-watershed imply an improvement in the adoption of SLM technologies. The increased adoption of SLM technologies are attributed to the PES scheme as an alternative approach. It may not be sufficient to compare and conclude on water quality improvement based on two field measurements observed before and after one year, but fitting the field observations in the SWAT model-system illustrates a positive trend towards delivery of the desired ecosystem services. It should be noted that the results presented in this article are not ultimate results rather findings monitored after one year to represent improved conditions (out of 'norm') achieved under PES scheme as an alternative approach to watershed management. If the initial findings are something to go by, then, it can be said that PES scheme played a fundamental role in improving water quality status from approximately 48% to 73% towards the targeted status according to the SWAT simulation.

From the field observations, it is evidently clear that best conditions of a watershed cannot be realised if farmers are left to continue under the 'norm' conditions. Alternative approaches to watershed management are inevitable. This study demonstrates that increased adoption of SLM technologies are possible under PES scheme which consequently can lead to provision of desired ecosystem services. The SWAT model predicts that the TSS would improve to desired status if the representative sub-watershed is managed to its best scenario. These conditions can only be realized if all farmers implement SLM technologies as recommended. PES incentives are expected to encourage full implementation of the land management plans.

The results in this study suggest that PES pilot project did not start from scratch as the average TSS observed at the onset of the study was 71.05mg/L against worst predicated scenario of an average of 124.15mg/L. This is an indication that some farmers adopt SLM technologies through their own initiatives – possibly through voluntarily attending to trainings, education background, through extension workers, media adverts etc. This way, there are some farmers who initiate own conservation measures without necessarily being incentivised. In this study, the own initiatives are regarded as conventional approaches. It was established that adoption of SLM technologies through conventional approach stood at 11% before the PES scheme. However, remarkable changes were observed after one year of PES project implementation where the SLM adoption improved to 32% within the first year. Watershed management through PES scheme is an alternative approach that should be promoted widely. PES scheme is seen as an effective approach in accelerating sustainable land management practices which can lead to improved conditions downstream.

#### Areas of further research

Long term research data is highly recommended to validate the effectiveness of PES over number of years especially on ecosystem services that manifest after long periods and establishing whether PES incentives actually maintain best conditions at farm level. More ecosystem services should also be monitored to validate the TSS results. The study utilized TSS as the key proxy indicator in assessing the effectiveness of PES approach within the first year. Other indicators for instance stream recharge in dry periods, land productivity, infiltration rates etc take longer periods before they manifest. This requires longer study periods which could affect the results observed in this study. SWAT model was calibrated and validated using data observed (for 71 days). This denotes lack of long term data for the study site to calibrate over a longer period which may affect the consistency of final results. SLM practices were represented by modifying model parameters to predict the best and worst scenarios. Fitting of actual measured values in between SWAT predicted scenarios is subjective and may vary with investigation methods of the measured values. However, this study demonstrates a positive trend towards the target scenario. The method presented in this study should also be validated on other sub-watersheds (including non-headwater) of different scales within the Sasumua watershed. The simulation results presented in this study are from one sub-watershed of out of possible 28 sub-watersheds. Thus, this study would be strengthened by validating the effectiveness of PES approach at multiple discretization levels and spatial scales within the Sasumua watershed.

#### Acknowledgements

The authors thank Dr. Karim Abbaspour for his commendable assistance with SWAT especially in running the new semi-automated calibration engine (SWAT-CUP). We also recognize World bank through KAPLSMP for funding this research project.



## References

- Abbaspour, K. C. (2015). *SWAT-CUP: SWAT calibration and Uncertainty programs - A user manual*.
- Adimassu, Z., Mekonnen, K., Yirga, C., & Kessler, A. (2012). *Effect of soil bunds on runoff, soil and nutrient losses, and crop yield in the central highlands of Ethiopia*. land degradation & development: Wiley Online Library.
- Adrian, M., Nicole, G.-C., Kebede, B., & McGuire, S. (2014). *Measuring effectiveness, efficiency and equity in an experimental Payments for Ecosystem Services trial*. Norwich NR4 7TJ, United Kingdom: University of East Anglia, School of International Development, Global Environmental Change 28 (2014) 216–226.
- Alberta-Gov. (2015). *Guide to watershed Management planning in Alberta*. ISBN 978-1-4601-1853-5.
- Arnold, J., Kiniry, J., Srinivasan, R., Williams, J., Haney, E., & S.L, N. (2012). *Soil and Water Assessment Tool (SWAT) Input/Output documentation version 2012*. Texas Water Resources Institute: TR-439.
- Arnold, J., Srinivisan, R., Muttiah, R., & Allen, P. (1998). Large-area hydrologic modeling and assessment: Part I. Model development. *J. American Water Resources Assoc* , 34(1):73-89.
- Arriagada, R., & Perrings, C. (2009). *Making Payments for Ecosystem Services Work*. UNEP: Ecosystem Services Economics.
- Aylward, B. (2002). *Landuse, hydrological function and economic valuation*. Final revised paper prepared for the proceedings of the UNESCO symposium /workshop, Forest-Water-People in the Humid Tropics, held in Kuala Lumpur, Malaysia, August 2000.
- BEF. (2012, July). *water restoration certificates® balance your business' water footprint and leave a lasting legacy*. Retrieved April 18, 2015, from Bonneville Environmental Foundation: <http://www.b-e-f.org/environmental-products/water-restoration-certificates/>
- Bennett, G., & Carroll, N. (2014). *Gaining Depth: State of Watershed Investment 2014*. A forest Trends Initiative: Available online at [www.ecosystemmarketplace.com/reports/sowi2014](http://www.ecosystemmarketplace.com/reports/sowi2014).
- Bibi, S. Z., Amir, H. M., Amir, W., & Qaisar, M. (2011). Water quality assessment of Siran river, Pakistan. *International Journal of the Physical Sciences Vol. 6(34)* , pp 7789 - 7798.
- Boisrame, G. (2016). *Softwares*. Retrieved March 3, 2016, from Soil and Water Assessment Tool: <http://swat.tamu.edu/software/>
- Bracmort, K., Arabi, M., Frankenberger, J., Engel, B., & Arnold, J. (2006). Modeling long-term water quality impact of structural BMPs. *American Society of Agricultural and Biological Engineers ISSN 0001–2351* , Vol. 49(2): 367–374.
- Branca, G., McCarthy, N., Lipper, L., & Jolejole, M. C. (2011). *Climate-Smart Agriculture: A Synthesis of Empirical Evidence of Food Security and Mitigation Benefits from Improved Cropland Management*. Mitigation of climate change in agricultural series 3: Food and Agriculture Organization of the United Nations (FAO).
- Casey, F., & Boody, G. (2006). *An Assessment of Performance-Based Indicators and Payments for Resource Conservation on Agricultural Lands*. Defenders of Wildlife: Conservation Economics White Paper 8 .

- Cau, P., & Paniconi, C. (2007). Assessment of alternative land management practices using hydrological simulation and a decision support tool: Arborea agricultural region, Sardinia. *Hydrology and Earth System Sciences* , 1811–1823.
- 5 DEFRA. (2013). *Payments for Ecosystem Services: A Best Practice Guide*. DEFRA: Department of Environment, Food & Rural affairs.
- Engel, S., Pagiola, S., & Wunder, S. (2008). *Designing payments for environmental services in theory and in practice: An overview of the issues*. *Ecological Economics* 65, 663-674.
- European commission. (2006). *Soil erosion by water - area eroded by more than 10 tonnes per hectare per year*. Compiling agency: Eurostat, the statistical office of the European Union, available at  
 10 [http://ec.europa.eu/eurostat/cache/metadata/en/t2020\\_rn300\\_esmsip.htm](http://ec.europa.eu/eurostat/cache/metadata/en/t2020_rn300_esmsip.htm).
- FAO. (2013). *Case studies on Remuneration of Positive Externalities (RPE)/Payments for Environmental Services (PES)*. Prepared for the Multi-stakeholder dialogue 12-13 September 2013 FAO, Rome.
- FAO. (2010). *Sustainable crop production intensification through an Ecosystem Approach and an enabling environment: Capturing efficiency through Ecosystem Services and management* . Rome: Committee on  
 15 Agriculture, Twenty-second Session, 16 – 19 June 2010.
- Forest Trends, The Katoomba Group, & UNEP. (2008). *Payments for Ecosystem Services: Getting Started; A Primer*. Forest Trends, The Katoomba Group, and UNEP; ISBN: 978-92-807-2925-2.
- Gathenya, J. M., Mwangi, J. K., & Muturi, W. M. (2014). *Situation Analysis Study On Payment For Ecosystem Services (PES) For Sasumua Reservoir In Kenya*. Ministry Of Environment, Water and Natural Resources.
- 20 Gathenya, J. M., Mwangi, J. K., Mwangi, H., & Namirembe, S. (2010). *Rewarding Upland Farmers for Environmental Services in Sasumua Watershed*. Presentation to stakeholders meeting to discuss PES implementation in Sasumua watershed held at World agroforestry Centre, Nairobi, 22 February 2010.
- Gitau, M., Gburek, W., & Bishop, P. (2008). Use of the swat model to quantify water quality effects of agricultural BMPs at the farm-scale level. *American Society of Agricultural and Biological Engineers ISSN 0001-2351* ,  
 25 Vol. 51(6): 1925-1936.
- GOV-UK. (2012, July). *Environmental Stewardship: funding to farmers for environmental land management*. Retrieved April 18, 2015, from Government of United Kingdom: <https://www.gov.uk/environmental-stewardship>
- Hardner, J., & Rice, R. (2002). *Rethinking green consumerism*. *Scientific American* May:89-95.
- 30 ICRAF. (2009). *Kenya Agricultural Productivity and Sustainable Land Management Project (KAPSLM) A Completion Report for "A study on Hydrological Services in Sasumua Watershed*. Word Agroforestry Centre, Nairobi.
- IIED. (2006, September). *The Vittel payments for ecosystem services: a "perfect" PES case?* Retrieved April 18, 2015, from The International Institute for Environment & Development : <http://pubs.iied.org/G00388.html>
- 35 Jairo, M. N. (2013). *Essays on Effects of Climate and Weather Variability on Sustainable Land Management, Crop Biodiversity and Poverty in Kenya*. University of Nairobi.

- Kieser. (2008). *Modeling of Agricultural BMP Scenarios in the PawPaw River Watershed using the Soil and Water Assessment Tool (SWAT)*. Benton Harbo: Southwest Michigan Planning Commission.
- Kihui, E. N. (2016). *Pastoral Practices, Economics, and Institutions of Sustainable Rangeland Management in Kenya*. PhD Dissertation, University of Bonn, 2016.
- 5 Kirui, O. K. (2016). Drivers of Sustainable Land Management in Eastern Africa. "2016 World Bank Conference on Land and Poverty" The World Bank - Washington DC, March 14-18, 2016. Washington DC: Center for Development Research, University of Bonn, Germany.
- Kleijn, D., Kohler, F., Báldi, A., Batáry, P., Concepcion, E., Clough, Y., et al. (2009). *On the relationship between farmland biodiversity and land-use intensity in Europe*. *Proceedings of the Royal Society B: Biological Sciences*, 276, 903-909.
- 10 Lajos, B. (2008). *Soil Science*. University of Debrecen. Agricultural and Applied Economic Sciences Centre . Research Karcagi Copyright © 2011 University of Debrecen . Agricultural and Applied Economic Sciences Centre.
- Liniger, H., Mekdaschi, S., Hauert, C., & Gurtner, M. (2011). *Sustainable Land Management in Practice: Guidelines and Best Practices for Sub-Saharan Africa*. TerrAfrica, World Overview of Conservation Approaches and Technologies (WOCAT) and Food and Agriculture Organization of the United Nations (FAO).
- 15 Ma, L., Ascough II, C., Ahuja, L. R., & Shaff, M. J. (2000). *Root Zone Water Quality Model sensitivity analysis using Monte Carlo simulation*. *Trans. ASAE* 43(4): 883-895.
- Mbonimpa, . E., Yuan, Y., Mehaffey, M. H., & Jackson, M. A. (2012). SWAT Model Application to Assess the Impact of Intensive Corn-Farming on Runoff, Sediments and Phosphorous Loss from an Agricultural Watershed in Wisconsin. *Journal of Water Resource and Protection*, 2012, , 423-431.
- 20 MEA. (2005). *Ecosystems and Human Well-being: Synthesis*. Millennium Ecosystem Assessment; Island Press, Washington, DC.
- Ministry of Livestock Production. (2014). *Mainstreaming Sustainable Land Management in Agropastoral Production Systems of Kenya*. UNDP PROJECT DOCUMENT -- UNDP PIMS No. 3245, GEF ID 3370.
- Mireri, C. (2009). *Preliminary Environmental Audit for Sasumua Watershed*. Technical Report; World Agroforestry Centre, Nairobi.
- MOA, & MOE. (2011). *Kenya Agricultural Productivity and Sustainable Land Management (KAPSLM): Project Implementation Plan*. Ministry of Agriculture (MOA), Ministry of Environment and Mineral Resources (MOE).
- 30 Molenaar, K. (2013). *Payments for Ecosystem Services (PES) design characteristics*. Deltares: 1206578-000-BGS-0004, 4 June 2013, final.
- Molua, E. L. (2014). Climate Change Perception and Farmers' Adoption of Sustainable Land Management for Robust Adaptation in Cameroon. *Journal of Agricultural Sciences* , Vol. 6, No. 12.
- 35 Mulinge, W., Gicheru, P., Murithi, F., Maingi, P., Kihui, E., Kirui, O. K., et al. (2016). *Economics of Land Degradation and Improvement in Kenya*. A Global Assessment for Sustainable Development DOI 10.1007/978-3-319-19168-3\_16.

- Mwangi, J. K. (2014). *Evaluation of Potential for PES and Policy implications in Sasumua watershed*. Kenya: Phd Thesis, School of Pure and Applied Sciences of Kenyatta University.
- 5 Mwangi, J. K., Gathenya, J. M., Namirembe, S., & Mwangi, H. (2011). *Institutional and policy Requirements for payments for watershed services in Kenya - a case study of Sasumua watershed, Kenya*. PRESA policy brief No. 2. .
- Mwangi, J., Shisanya, C., Gathenya, J., Namirembe, S., & Moriasi, D. (2015). A modeling approach to evaluate the impact of conservation practices on water and sediment yield in Sasumua Watershed, Kenya. *Journal of Soil and Water Conservation* , March/April 2015—VOL. 70, NO. 2.
- 10 Mwangi, J., Thiong'o, G., & Gathenya, J. (2014). *Assessment of the water quality status of Sasumua watershed, Kenya*.
- Nambiar, L., & Wainer, J. (2011, July). *Collecting Soil and Plant Samples for Nematode Analysis*. Retrieved April 1, 2016, from Agriculture Victoria : <http://agriculture.vic.gov.au/agriculture/pests-diseases-and-weeds/plant-diseases/fruit-and-nuts/stone-fruit-diseases/collecting-soil-and-plant-samples-for-nematode-analysis>
- 15 Namirembe, S., Mwangi, J. K., & Gathenya, J. M. (2013). *Implementing PES within public watershed management structures: A case of Sasumua watershed in Kenya*. Prepared for the Multi-stakeholder dialogue 12-13 September 2013 FAO, Rome.
- Neitsch, S., Arnold, J., Kiniry, J., Srinivasan, R., Williams, J., & King, K. (2002). *Soil and Water Assessment Tool—Theoretical Documentation. Version 2000*. Blackland Research & Extension Center, Temple, Texas, USA.
- 20 Nkonya, E., Gicheru, P., Okoba, B., & Gachimbi, L. (2008). *On-site and Off-site Long-Term Economic Impacts of soil Fertility Management Practices - The Case of Maize-Based Cropping Systems in Kenya*. Washington, DC 20006-1002 USA: IFPRI Discussion Paper 00778: Environment and Production Technology Division.
- Pagiola, S. (2008). Payments for environmental services in Costa Rica. *Ecological Economics* , 712–724.
- 25 Pagiola, S., Bishop, J., & N. Landell-Mills, e. (2002). *Selling forest environmental services Market-based mechanisms for conservation and development*. . London & Sterling: Earthscan.
- Porras, I., Alyward, B., & Dengel, J. (2013). *Monitoring payments for watershed services schemes in developing countries*. London: IIED.
- Porras, I., Barton, D., ChaCón-CasCan, A., & Miranda, M. (2013). *Learning from 20 years of Payments for Ecosystem Services in Costa Rica*. International Institute for Environment and Development, London.
- 30 Porras, I., Denge, J., & Aylward, B. (2012). *Monitoring and evaluation of Payment for Watershed Service Schemes in developing countries*. 14th Annual BioEcon Conference on “Resource Economics, Biodiversity Conservation and Development”. 18-20 September 2012. Kings College, Cambridge. United Kingdom .
- PRESA. (2014). *Designing equitable payments for watershed services at the Sasumua watershed*. Retrieved May 11, 2015, from Pro poor Rewards for Environmental Services in Africa: [http://presa.worldagroforestry.org/?page\\_id=713](http://presa.worldagroforestry.org/?page_id=713)
- 35 Sandra, L., Postel, Barton, H., & Thompson, J. (2005). *Watershed protection: Capturing the benefits of nature's water supply services*. Natural Resources Forum 29 (2005) 98–108.

- Schneekloth, J., Bauder, T., Broner, I., & Waskom, R. (2014). *Measurement of Soil Moisture*. Retrieved July 24, 2015, from Colorado State university: <http://www.ext.colostate.edu/drought/soilmoist.html>
- Schwilch, G., Liniger, H., & Hurni, H. (2013). *Sustainable Land Management (SLM) Practices in Drylands: How Do They Address Desertification Threats?* Springer Science+Business Media New York 2013.
- 5 Shiferaw, B., Okello, J., & Reddy, V. R. (2009). *13 Challenges of adoption and adaptation of Land and Water Management Options in Smallholder Agriculture: Synthesis of Lessons and Experiences*. CAB International 2009. Rainfed Agriculture: Unlocking the Potential.
- Smith, M., De Groot, D., Perrot-Maître, D., & Bergkamp, G. (2006). *Pay – Establishing payments for watershed services*. Gland, Switzerland: IUCN, 2008.
- 10 Sterve, H. (2010). *Factors restricting adoption of sustainable agricultural practices in a smallerholder agrosystem. A case study of Potshini community, upper Thukela region, South Africa*. Masters dissertation in Ecosystems, Governance and Globalization. Stockholm Resilience Centre, Stockholm university .
- Taft, R., & Jones, C. (2001). *Sediment Sampling Guide and Methodologies*. State of Ohio Environmental Protection Agency.
- 15 Tanui, J., Groeneveld, R. A., Klomp, J., Gasper, J., & Van Ierland, E. C. (2014). *Climate Change and Investments in Sustainable Land Management: Case study: Vihiga, western Kenya*. Environmental Economics & Natural Resources Group, Wageningen University.
- Tintometer Group. (n.d.). *Lovibond water Testing*. Retrieved November 23, 2016, from Tintometer Group: <http://www.lovibond.com/en/pool/photometer/md-100>
- 20 Vagen, T. G. (2009). *Assesment of Land Degradation in Sasumua watershed: Baseline Report*. . Technical Report World Agroforestry Centre.
- Victoria-State. (2012, June). *Conservation and environment*. Retrieved April 18, 2015, from Department of Sustainability and Environment: <http://www.dse.vic.gov.au/conservation-and-environment/biodiversity/rural-landscapes/bushtender>
- 25 Waidler, D., White, M., Steglich, E., Jones, C., & Srinivasan, R. (2011). *Conservation Practice Modelling for SWAT and APEX*. Texas A&M University System College Station, Texas 77843-2118: Texas Water Resources Institute Technical Report No. 399.
- Weaver, W., Gerstein, J., & Harris, R. (2005). *Monitoring the Effectiveness of Upland Restoration*. University of California, Center for Forestry, Berkeley, CA. 100 pp.
- 30 World Bank. (2010). *Managing land in a changing climate: an operational perspective for Sub-Saharan Africa*. Report No.: 54134-AFR. WB, Washington D.C.
- World Bank. (2008). *Sustainable Land Management Sourcebook*. The International Bank for Reconstruction and Development / The World Bank. ISBN 978-0-8213-7432-0.
- WRO. (2011). *Farmers' Decision Making*. Wales Rural Observatory.
- 35 WSDNR. (2012). *Forest Watershed Ecosystem Services*. Washington State Department of Natural Resources.
- Wunder Sven. (2005). *Payments for environmental services: Some nuts and bolts*. CIFOR Occasional Paper No. 42; Center for International Forestry Research; ISSN 0854-9818.

Xie, Y., Liu, B., & Nearing, M. (2002). Practical Thresholds for Separating Erosive and Non-Erosive Storms. *American Society of Agricultural Engineers* , Vol. 45(6): 1843–1847 ISSN 0001–2351.

Yirga, C., & Hassan, R. (2010). *Social costs and incentives for optimal control of soil nutrient depletion in the central highlands of Ethiopia*. *Agricultural Systems* 103: 153–160.

**Table 1: Chronology of KAPSLMP PES project implementation in Sasumua watershed**

| <i>Date</i>                                      | <i>KAPSLMP activities</i>                                                                                                                                                                                                                                                                         |                                                                                                     |
|--------------------------------------------------|---------------------------------------------------------------------------------------------------------------------------------------------------------------------------------------------------------------------------------------------------------------------------------------------------|-----------------------------------------------------------------------------------------------------|
| <b><i>Exploratory studies</i></b>                |                                                                                                                                                                                                                                                                                                   |                                                                                                     |
| 2005/2006                                        | <i>PES project conceptualization</i>                                                                                                                                                                                                                                                              |                                                                                                     |
| 2008/2009                                        | <i>PES feasibility study by ICRAF/PRESA</i>                                                                                                                                                                                                                                                       |                                                                                                     |
| 2009                                             | <i>Situational analysis study</i>                                                                                                                                                                                                                                                                 |                                                                                                     |
| 2011                                             | <i>A study to evaluate the impacts of soil and water conservation practices on ecosystem services in Sasumua watershed, using SWAT model</i>                                                                                                                                                      |                                                                                                     |
| 2013                                             | <i>The World Agroforestry Centre (ICRAF) in partnership with Jomo Kenyatta University of Agriculture and Technology (JKUAT) sought to explore the potential of using Payment for Ecosystems Services (PES) through its program, Pro-poor Rewards for Environmental Services in Africa (PRESA)</i> |                                                                                                     |
| 2014                                             | <i>Policy and institutional analysis for PES</i>                                                                                                                                                                                                                                                  |                                                                                                     |
| 2014                                             | <i>A study to assess water quality status of Sasumua Watershed (Baseline Results of key monitoring points)</i>                                                                                                                                                                                    |                                                                                                     |
| 2014                                             | <i>A study to evaluate the potential for Payment for Ecosystem Services (PES) and policy implications in Sasumua watershed.</i>                                                                                                                                                                   |                                                                                                     |
| <b><i>Actualizing 'theory into practice'</i></b> |                                                                                                                                                                                                                                                                                                   | <b><i>M.sc research project activities</i></b>                                                      |
| <i>February - March 2015</i>                     | <i>Preliminary meetings with key stakeholders</i>                                                                                                                                                                                                                                                 | <i>M.sc Research Proposal and establishment of a representative watershed</i>                       |
| <i>March - May 2015</i>                          | <i>Awareness creation on PES pilot project to potential small scale farmers, formation of CIGs and training</i>                                                                                                                                                                                   | <i>Baseline on water quality in the study site</i>                                                  |
| <i>June 2015</i>                                 | <i>Setting out - Establishment of individual Land Management Plans (LMPs) including field demonstrations</i>                                                                                                                                                                                      | <i>Baseline on SLM status in the study site</i>                                                     |
| <i>October 2015</i>                              | <i>Training PES sub-committee on data collection</i>                                                                                                                                                                                                                                              |                                                                                                     |
| <i>October 2015</i>                              | <i>Signing of PES contracts between the ES buyers and the sellers</i>                                                                                                                                                                                                                             |                                                                                                     |
| <i>October - December 2015</i>                   |                                                                                                                                                                                                                                                                                                   | <i>Rainy season (Water quality sampling)</i>                                                        |
| <i>March 2016</i>                                | <i>Auditing for PES rewards</i>                                                                                                                                                                                                                                                                   |                                                                                                     |
| <i>April 2016</i>                                | <i>Rewarding of the leading farmers</i>                                                                                                                                                                                                                                                           |                                                                                                     |
| <i>March - May 2016</i>                          |                                                                                                                                                                                                                                                                                                   | <i>Rainy season (Water quality sampling)</i>                                                        |
| <i>June 2016</i>                                 |                                                                                                                                                                                                                                                                                                   | <i>Field study to establish SLM progress in the study site after one year of PES implementation</i> |

**Table 2: Target SLM technologies under KAPSLMP PES project in Sasumua watershed**

| <b><i>SLM Technology</i></b>              | <b><i>Njabini MC</i></b> | <b><i>Kiburu MC</i></b> | <b><i>Githabai MC</i></b> | <b><i>Mukeu MC</i></b> | <b><i>TOTAL Target</i></b> |
|-------------------------------------------|--------------------------|-------------------------|---------------------------|------------------------|----------------------------|
| <i>Terrace (M)</i>                        | <i>46,587</i>            | <i>15,613</i>           | <i>2,693</i>              | <i>18,312</i>          | <i>83,205</i>              |
| <i>Drainage channels(M)</i>               | <i>6,235</i>             | <i>4,855</i>            | <i>34,127</i>             | <i>9,703</i>           | <i>54,920</i>              |
| <i>Retention ditch (M)</i>                | <i>3,058</i>             | <i>3,285</i>            | <i>2,839</i>              | <i>4,207</i>           | <i>13,389</i>              |
| <i>Cut off Drains (M)</i>                 | <i>10,861</i>            | <i>350</i>              | <i>16,933</i>             | <i>1,761</i>           | <i>29,905</i>              |
| <i>Grass strip (M)</i>                    | <i>15,391</i>            | <i>33,195</i>           | <i>11,145</i>             | <i>14,622</i>          | <i>74,353</i>              |
| <i>Riverbank protection (M)</i>           | <i>2,130</i>             | <i>79</i>               | <i>0</i>                  | <i>957</i>             | <i>3,166</i>               |
| <i>No. of grass splits</i>                | <i>206,301</i>           | <i>159,756</i>          | <i>178,513</i>            | <i>126,763</i>         | <i>671,333</i>             |
| <i>No. of trees (forest/fodder/fruit)</i> | <i>13,823</i>            | <i>25,511</i>           | <i>20,229</i>             | <i>12,221</i>          | <i>71,784</i>              |
|                                           |                          |                         |                           |                        | <i>n = 1,017</i>           |

**Table 3: Land cover percentages in the study site**

|             | <i>Sub-basin 1</i> | <i>Sub-basin 2</i> | <i>Sub-basin 3</i> |
|-------------|--------------------|--------------------|--------------------|
| Forest      | 351.52 Ha(96.7%)   | 174.95 Ha (86.4%)  | 6.03 Ha (14.4%)    |
| Pasture     | 0.58 Ha (0.2%)     | 1.22 Ha (0.6%)     | 2.28 Ha (5.4%)     |
| Agriculture | 11.50 Ha (3.1%)    | 26.25 Ha (13%)     | 33.63 Ha (80.2%)   |
| Total       | 363.60 ha          | 202.42 ha          | 41.94 ha           |

**Table 4: Land use in the representative sub-watershed**

| <i>Land use</i> | <i>Area</i> |
|-----------------|-------------|
| Forest          | 87.6 %      |
| Pasture         | 0.7 %       |
| Agriculture     | 11.7 %      |

**Table 5: Model input data information**

| <i>Data type</i>                 | <i>Source</i>                                                                                                                                                          | <i>Description</i>                                                                                                              |
|----------------------------------|------------------------------------------------------------------------------------------------------------------------------------------------------------------------|---------------------------------------------------------------------------------------------------------------------------------|
| DEM                              | USGS website                                                                                                                                                           | 30 m resolution, U.S. Geological Survey (USGS)                                                                                  |
| Soils                            | SOTER                                                                                                                                                                  | 1:1,000,000 Soil data was extracted from the Digital Soil and Terrain Database of East Africa (SOTER).                          |
| Land use                         | USGS website                                                                                                                                                           | Landcover maps were generated from 2016 landsat image obtained from USGS website using maximum likelihood method classification |
| Weather (1970-2014) <sup>a</sup> | Weather records for three stations in the watershed; Agricultural training centre (9036152), South Kinangop forest station (9036164) and Sasumua dam station (9036188) | Minimum and maximum daily temperature, daily precipitation, relative humidity, solar and wind                                   |
| Rainfall <sup>b</sup>            | Observed between January and May 2016                                                                                                                                  | Daily precipitation                                                                                                             |
| Crop management                  | Field survey, (Mwangi et al., 2014)                                                                                                                                    | Interviews with key informants and individual farmers on historical and current field crops and reviewing available literature. |
| Stream flow                      | Observed during March 18 <sup>th</sup> – May 27 <sup>th</sup>                                                                                                          | Daily stream flow (m <sup>3</sup> /s)                                                                                           |
| Water quality                    | Observed during three rainy seasons<br>March – May 2015<br>October – December 2015<br>March – May 2016                                                                 | Daily Total Suspended Solids (TSS)                                                                                              |

5 <sup>a</sup>Weather data between 1970 and 2014 was used in generating a weather generator data (WGN) for the study site using WGNmaker4 (Boisrame, 2016). This was particularly important in simulating the weather data that was not actually measured during the study period e.g solar, wind, relative humidity etc.

<sup>b</sup>The rainfall observed during the study period was used in SWAT calibration and in focusing the modelling to specific period of simulation (starting and ending dates) during which actual data collection on flow and Total suspended solids (TSS) was carried out.



**Table 6: Selected land management operations with their adjusted parameters to reflect best and worst scenarios in SWAT**

| <i>Main SLM Technologies promoted under PES pilot project</i>                                                                   | <i>Land Management selected for representation in SWAT</i> | <i>Adjusted Parameters in SWAT</i> | <i>Description</i>                                                                                          | <i>Parameter ranges</i> | <i>Adjusted to reflect Best scenario</i> | <i>Adjusted to reflect Worst scenario</i> |
|---------------------------------------------------------------------------------------------------------------------------------|------------------------------------------------------------|------------------------------------|-------------------------------------------------------------------------------------------------------------|-------------------------|------------------------------------------|-------------------------------------------|
| <i>FanyaJuu terraces and retention ditches</i>                                                                                  | <i>Terraces</i>                                            | <i>TERR-P</i>                      | <i>To reflect reduced sediment losses</i>                                                                   | <i>0-1</i>              | <i>0.18</i>                              | <i>1</i>                                  |
|                                                                                                                                 |                                                            | <i>TERR-SL</i>                     | <i>To represent the minimum distance between the terraces in meters</i>                                     | <i>0-100</i>            | <i>5</i>                                 | <i>100</i>                                |
|                                                                                                                                 |                                                            | <i>TERR-CN</i>                     | <i>To account for increased infiltration</i>                                                                | <i>20-100</i>           | <i>76</i>                                | <i>99</i>                                 |
| <i>Contour farming</i>                                                                                                          | <i>Contour planting</i>                                    | <i>CONT_CN</i>                     | <i>To account for increased surface storage and infiltration</i>                                            | <i>20-100</i>           | <i>76</i>                                | <i>99</i>                                 |
|                                                                                                                                 |                                                            | <i>CONT_P</i>                      | <i>To account for decreased erosion</i>                                                                     | <i>0-1</i>              | <i>0.18</i>                              | <i>1</i>                                  |
| <i>Grass strips</i>                                                                                                             | <i>Filter strip</i>                                        | <i>VFSRATIO</i>                    | <i>Ratio of field area to filter strip area</i>                                                             | <i>0-300</i>            | <i>30</i>                                | <i>300</i>                                |
|                                                                                                                                 |                                                            | <i>VFSCON</i>                      | <i>Fraction of the HRU which drains to the most concentrated 10% of filter strip</i>                        | <i>0.25-0.75</i>        | <i>0.75</i>                              | <i>0.25</i>                               |
|                                                                                                                                 |                                                            | <i>VFSCH</i>                       | <i>Fraction of the flow within the most concentrated 10% of the filter strip which is fully channelized</i> | <i>0-100</i>            | <i>5</i>                                 | <i>100</i>                                |
|                                                                                                                                 |                                                            | <i>FILTERW</i>                     | <i>To account for increasing trapping efficiency of the filter strip</i>                                    | <i>0-100</i>            | <i>5</i>                                 | <i>0</i>                                  |
| <i>Planting of fruit/fodder trees along the contour (deep rooted) and planting crops (shallow rooted) in between the strips</i> | <i>Strip cropping</i>                                      | <i>STRIP_N</i>                     | <i>To represent increased surface roughness in the direction of flow</i>                                    | <i>0.001-0.5</i>        | <i>0.5</i>                               | <i>0.001</i>                              |
|                                                                                                                                 |                                                            | <i>STRIP_CN</i>                    | <i>To account for increased infiltration</i>                                                                | <i>20-100</i>           | <i>76</i>                                | <i>99</i>                                 |
|                                                                                                                                 |                                                            | <i>STRIP_C</i>                     | <i>To reflect the average value of the multiple crops within the field</i>                                  | <i>0-1</i>              | <i>0.4</i>                               | <i>0.4</i>                                |
|                                                                                                                                 |                                                            | <i>STRIP_P</i>                     | <i>To account for decreased erosion</i>                                                                     | <i>0-1</i>              | <i>0.18</i>                              | <i>1</i>                                  |

**Table 7: Progress of SLM adoption through the PES pilot project in the study site**

| <i>SLM Technology</i>              | <i>A</i><br><i>Baseline status</i> | <i>B</i><br><i>After 1 year</i> | <i>C</i><br><i>Baseline status</i><br>$= A/F$ | <i>D</i><br><i>After 1 year</i><br>$= B/F$ | <i>E</i><br><i>Change</i><br>$= \frac{B-A}{F}$ | <i>F</i><br><i>Target</i> |
|------------------------------------|------------------------------------|---------------------------------|-----------------------------------------------|--------------------------------------------|------------------------------------------------|---------------------------|
| <i>Terrace (M)</i>                 | 820                                | 1,561                           | 9%                                            | 18%                                        | 8%                                             | 8,820                     |
| <i>Retention ditch (M)</i>         | 120                                | 551                             | 4%                                            | 18%                                        | 14%                                            | 3,120                     |
| <i>Grass strip (M)</i>             | 920                                | 3725                            | 10%                                           | 42%                                        | 32%                                            | 8,820                     |
| <i>Riverbank protection (M)</i>    | 210                                | 520                             | 21%                                           | 51%                                        | 31%                                            | 1,015                     |
| <i>No. of Napier splits</i>        | --                                 | 10865                           | --                                            | 47%                                        | --                                             | 22,925                    |
| <i>No. of Forest trees</i>         | --                                 | 183                             | --                                            | 15%                                        | --                                             | 1185                      |
| <i>No. of Fruit trees</i>          | --                                 | 1095                            | --                                            | 96%                                        | --                                             | 1145                      |
| <b><i>Average SLM adoption</i></b> |                                    |                                 | <b>11%<sup>a</sup></b>                        | <b>32%<sup>a</sup></b>                     | <b>21%</b>                                     |                           |

<sup>a</sup>Only Terraces, Retention ditches, Grass strips and Riverbank protection were considered (proxy indicators of SLM adoption) as they were easily measurable in baseline and the current status.

**Table 8: Model parameters considered in SWAT-CUP calibration**

| <i>Parameter</i>                                | <i>Description</i>                                                                                           | <i>Minimum-maximum</i> | <i>Default values</i> | <i>Final calibrated values</i> |
|-------------------------------------------------|--------------------------------------------------------------------------------------------------------------|------------------------|-----------------------|--------------------------------|
| <b><i>Parameters sensitive to Discharge</i></b> |                                                                                                              |                        |                       |                                |
| <i>CN2.mgt</i>                                  | <i>Initial SCS runoff curve number for moisture condition II</i>                                             | 35 - 98                | 83                    | 81.4                           |
| <i>ALPHA_BF.gw</i>                              | <i>Base flow alpha factor (1/days)</i>                                                                       | 0 - 1                  | 0.048                 | 0.6                            |
| <i>GW_DELAY.gw</i>                              | <i>Ground water delay time (days)</i>                                                                        | 0 - 500                | 31                    | 19.9                           |
| <i>GWQMN.gw</i>                                 | <i>Threshold depth of water in the shallow aquifer required for return flow to occur (mm H<sub>2</sub>O)</i> | 0 - 5000               | 1000                  | 2809.3                         |
| <i>ESCO.hru</i>                                 | <i>Soil evaporation compensation factor</i>                                                                  | 0 - 1                  | 0.95                  | 0.1                            |
| <i>EPCO.hru</i>                                 | <i>Plant uptake compensation factor</i>                                                                      | 0 - 1                  | 1                     | 0.6                            |
| <i>SOL_K.sol</i>                                | <i>Saturated hydraulic conductivity (mm/hr)</i>                                                              | 0 - 2000               | 65                    | 252.7                          |
| <i>SOL_AWC.sol</i>                              | <i>Available water capacity of the soil layer (mm H<sub>2</sub>O/mm soil)</i>                                | 0 - 1                  | 0.3                   | 0.2                            |
| <i>SLSUBBSN.hru</i>                             | <i>Average slope length (m)</i>                                                                              | 10 - 150               | 60.98                 | 74.8                           |
| <i>CH_K2.rte</i>                                | <i>Effective hydraulic conductivity in main channel alluvium (mm/hr)</i>                                     | -0.01 - 500            | 0                     | 27.9                           |
| <i>OV_N.hru</i>                                 | <i>Manning's N value overland flow</i>                                                                       | 0.01 - 30              | 0.14                  | 29.9                           |
| <i>HRU_SLP.hru</i>                              | <i>Average slope steepness (m/m)</i>                                                                         | 0 - 0.6                | 0.0766                | 0.5                            |
| <b><i>Parameters sensitive to sediments</i></b> |                                                                                                              |                        |                       |                                |
| <i>SPEXP.bsn</i>                                | <i>Channel re-entrained exponent parameter</i>                                                               | 1 - 1.5                | 1                     | 1.2                            |
| <i>SPCON.bsn</i>                                | <i>Channel re-entrained linear parameter</i>                                                                 | 0.0001 - 0.01          | 0.0001                | 0.00237                        |
| <i>CH_EROD.rte</i>                              | <i>Channel erodability factor</i>                                                                            | 0 - 1                  | 0                     | 0.2                            |
| <i>CH_COV.rte</i>                               | <i>Channel cover factor</i>                                                                                  | -0.001 - 1             | 0                     | 0.6                            |
| <i>USLE_P.mgt</i>                               | <i>Support practice factor</i>                                                                               | 0 - 1                  | 1                     | 0.8                            |

5

10

**Table 9: Rainfall characteristics for March – May 2015 and March – May 2016**

| <i>Seasonal Totals</i>                                | <i>MAM 2015 (mm)</i> | <i>MAM 2016 (mm)</i> |
|-------------------------------------------------------|----------------------|----------------------|
|                                                       | 811.7                | 912.6                |
| <i>Monthly Totals</i>                                 | <i>MAM 2015 (mm)</i> | <i>MAM 2016 (mm)</i> |
| <i>March</i>                                          | 93.8                 | 52.6                 |
| <i>April</i>                                          | 384.1                | 412.1                |
| <i>May</i>                                            | 333.8                | 447.9                |
|                                                       | <i>MAM 2015 (mm)</i> | <i>MAM 2016 (mm)</i> |
| <i>Number of rain Days</i>                            | 46                   | 58                   |
| <i>Average (mm) per day</i>                           | 8.82                 | 9.92                 |
| <i>Number of rainfall days exceeding 30mm per day</i> | 7                    | 8                    |

***t-Test: Two-Sample Assuming Unequal Variances***

|                                     | <i>MAM 2015 (mm)</i> | <i>MAM 2016 (mm)</i> |
|-------------------------------------|----------------------|----------------------|
| <i>Mean</i>                         | 8.822826087          | 9.919565217          |
| <i>Variance</i>                     | 194.8576051          | 217.1771954          |
| <i>Observations</i>                 | 92                   | 92                   |
| <i>Hypothesized Mean Difference</i> | 0                    |                      |
| <i>df</i>                           | 181                  |                      |
| <i>t Stat</i>                       | -0.518239252         |                      |
| <i>P(T&lt;=t) one-tail</i>          | 0.302462135          |                      |
| <i>t Critical one-tail</i>          | 1.653315758          |                      |
| <i>P(T&lt;=t) two-tail</i>          | 0.60492427           |                      |
| <i>t Critical two-tail</i>          | 1.973157001          |                      |

**Table 10: Test for significant differences for TSS (March - May 2015 and March - May 2016)*****t-Test: Two-Sample Assuming Unequal Variances***

|                                     | <i>TSS (MAM2015)</i> | <i>MAM 2016</i> |
|-------------------------------------|----------------------|-----------------|
| <i>Mean</i>                         | 71.0501356           | 42.73239437     |
| <i>Variance</i>                     | 1273.523047          | 577.484507      |
| <i>Observations</i>                 | 31                   | 71              |
| <i>Hypothesized Mean Difference</i> | 0                    |                 |
| <i>df</i>                           | 42                   |                 |
| <i>t Stat</i>                       | 4.036527381          |                 |
| <i>P(T&lt;=t) one-tail</i>          | 0.000112488          |                 |
| <i>t Critical one-tail</i>          | 2.418470354          |                 |
| <i>P(T&lt;=t) two-tail</i>          | 0.000224976          |                 |
| <i>t Critical two-tail</i>          | 2.69806618           |                 |

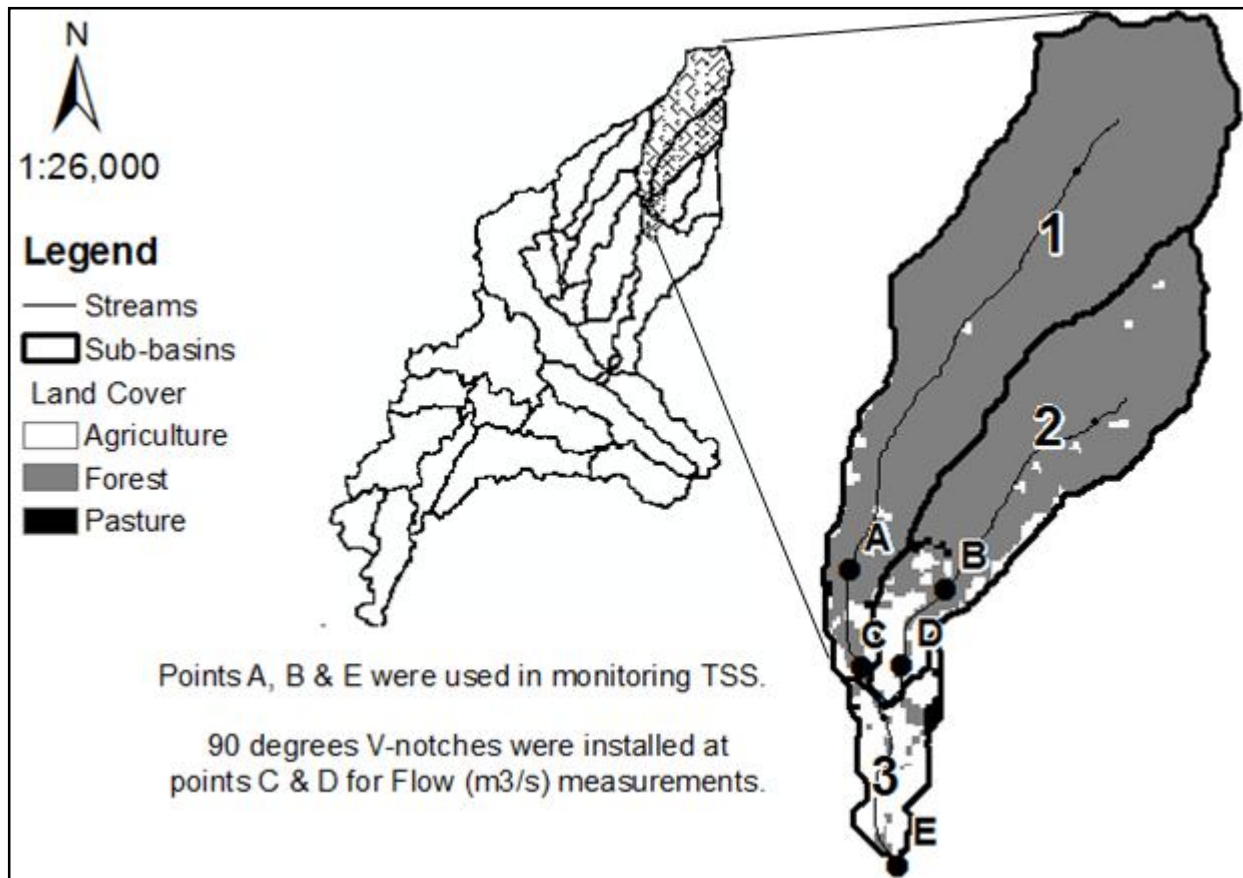

Figure 1: The representative sub-watershed (headwater)

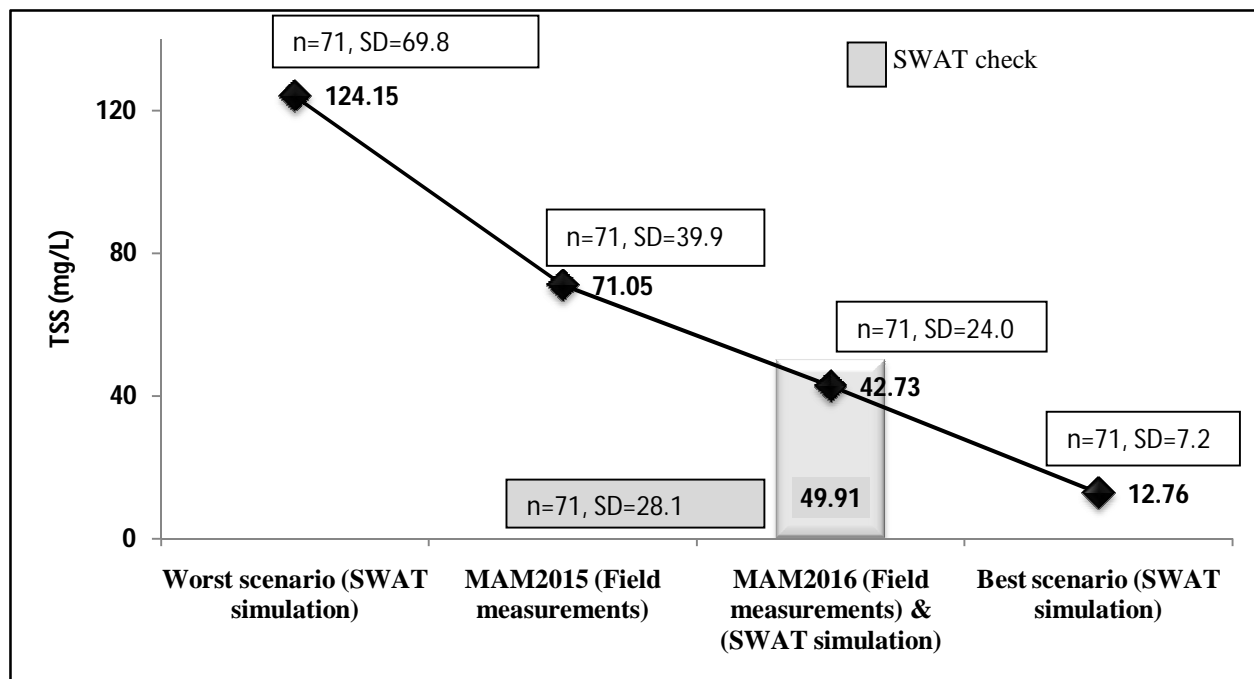

Figure 2: Simulated impact of PES scheme on water quality

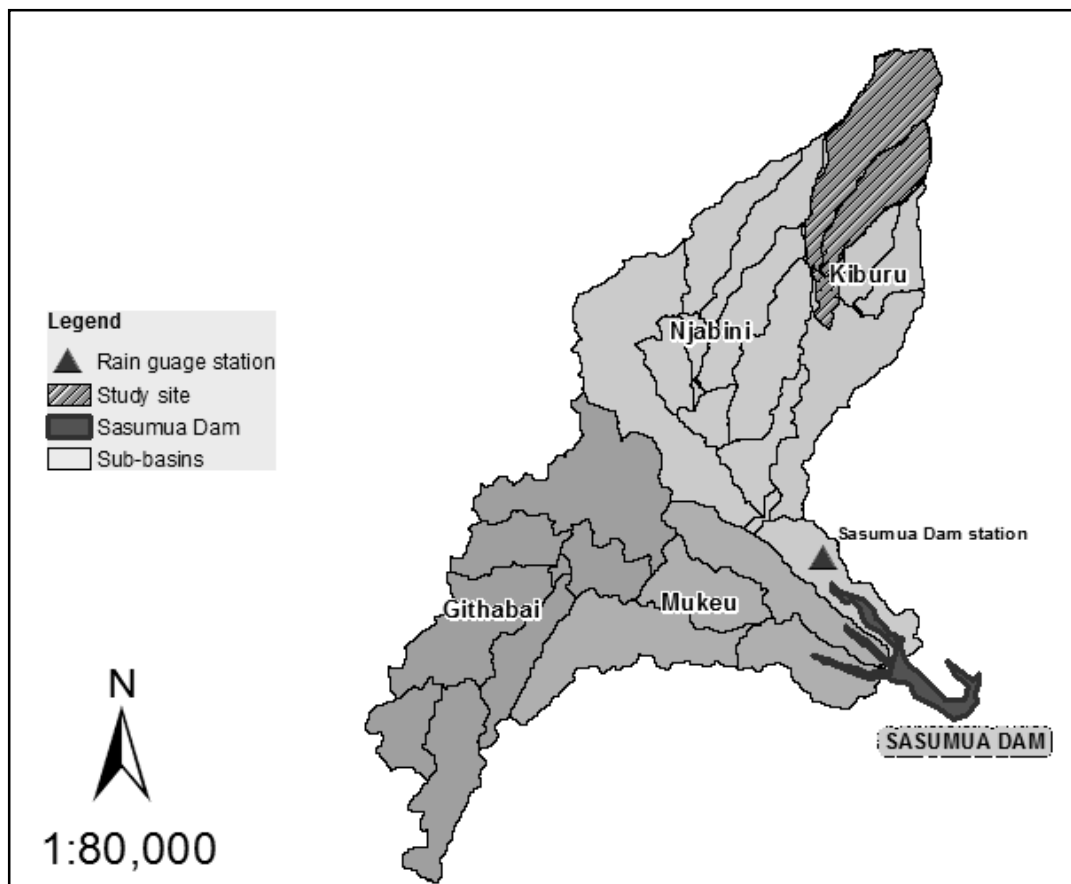

Figure 3: Sasumua Dam Rain gauge station

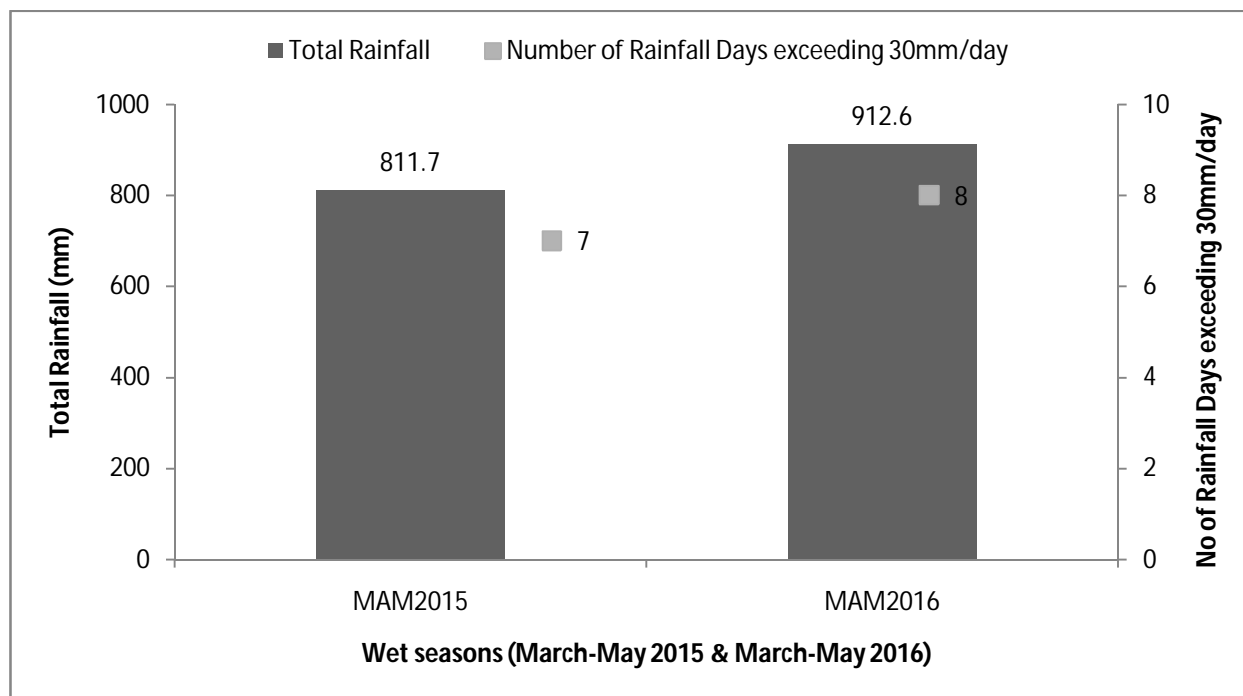

Figure 4: Rainfall series for both March-May 2015 and March-May 2016

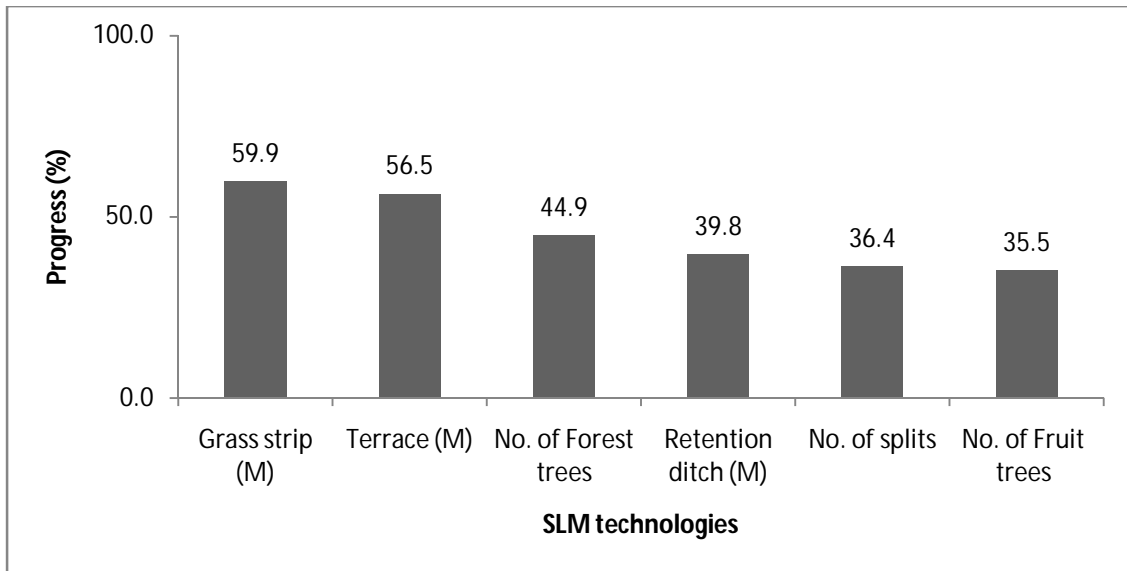

**Figure 5: Progress of SLM adoption after one year of PES implementation**

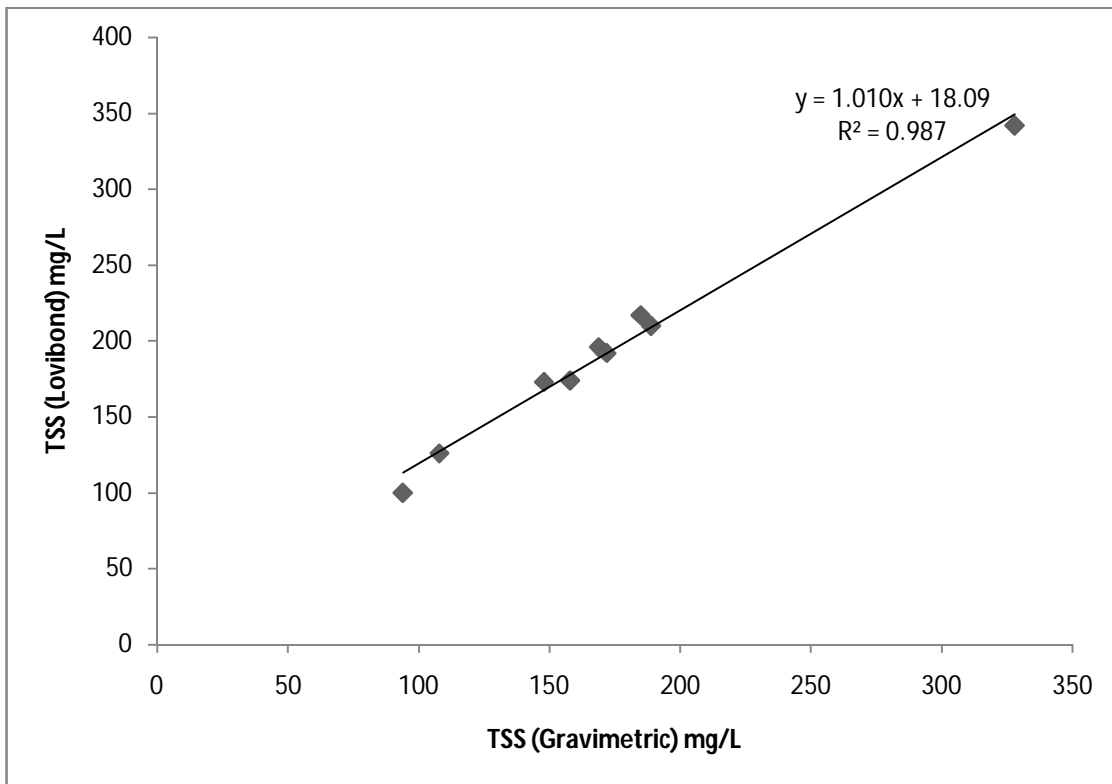

**5 Figure 6: The relationship between Lovibond TSS and gravimetric TSS**

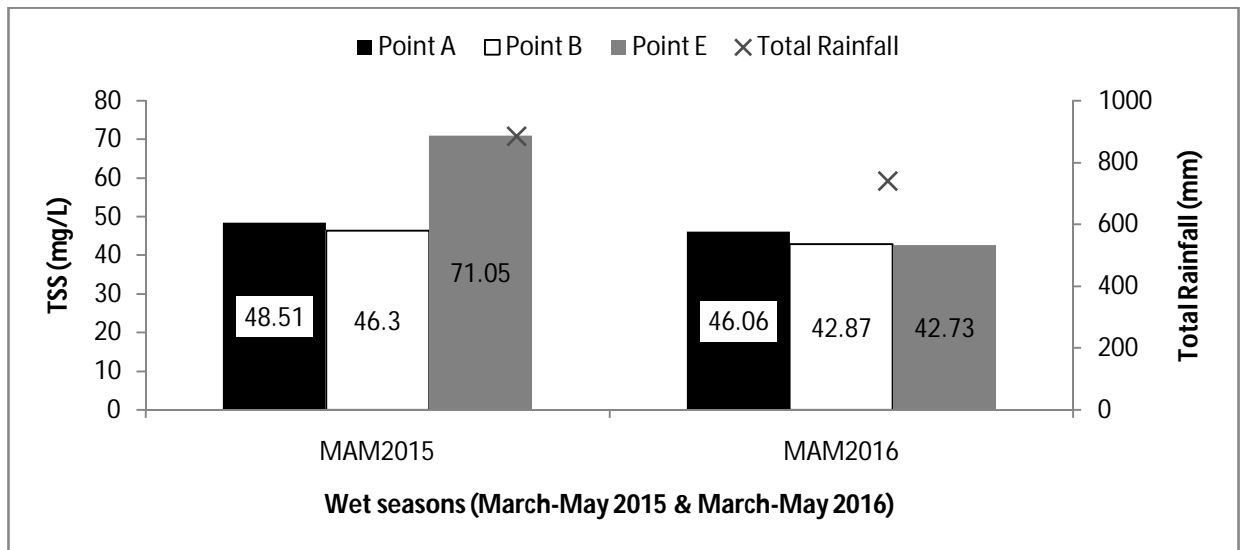

**Figure 7: TSS results of the three points (A, B & E) during the two rainy seasons of March-May 2015 and March-May 2016**

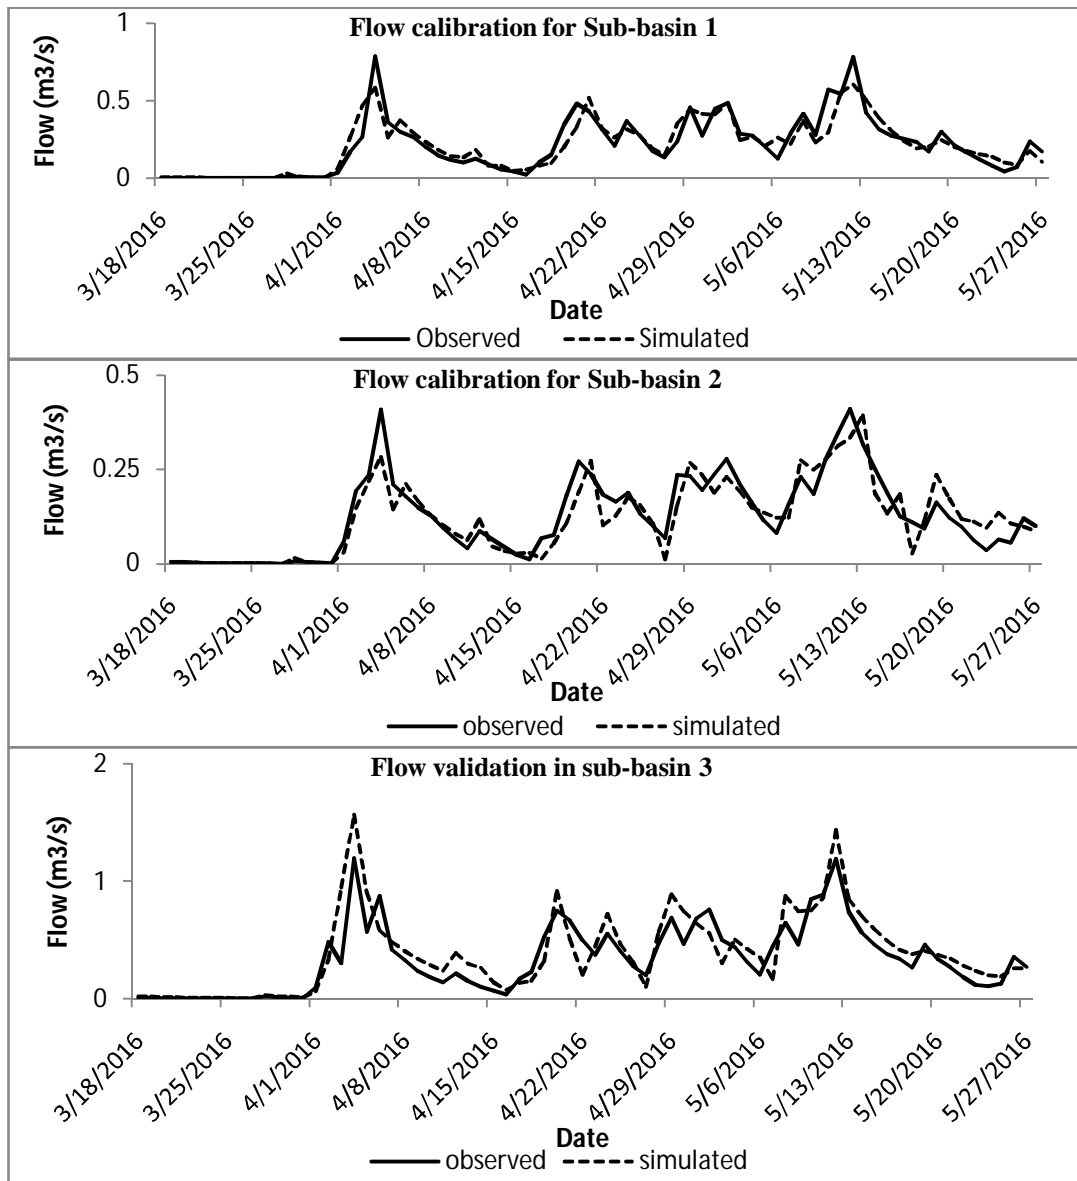

Figure 8: Flow calibration and validation



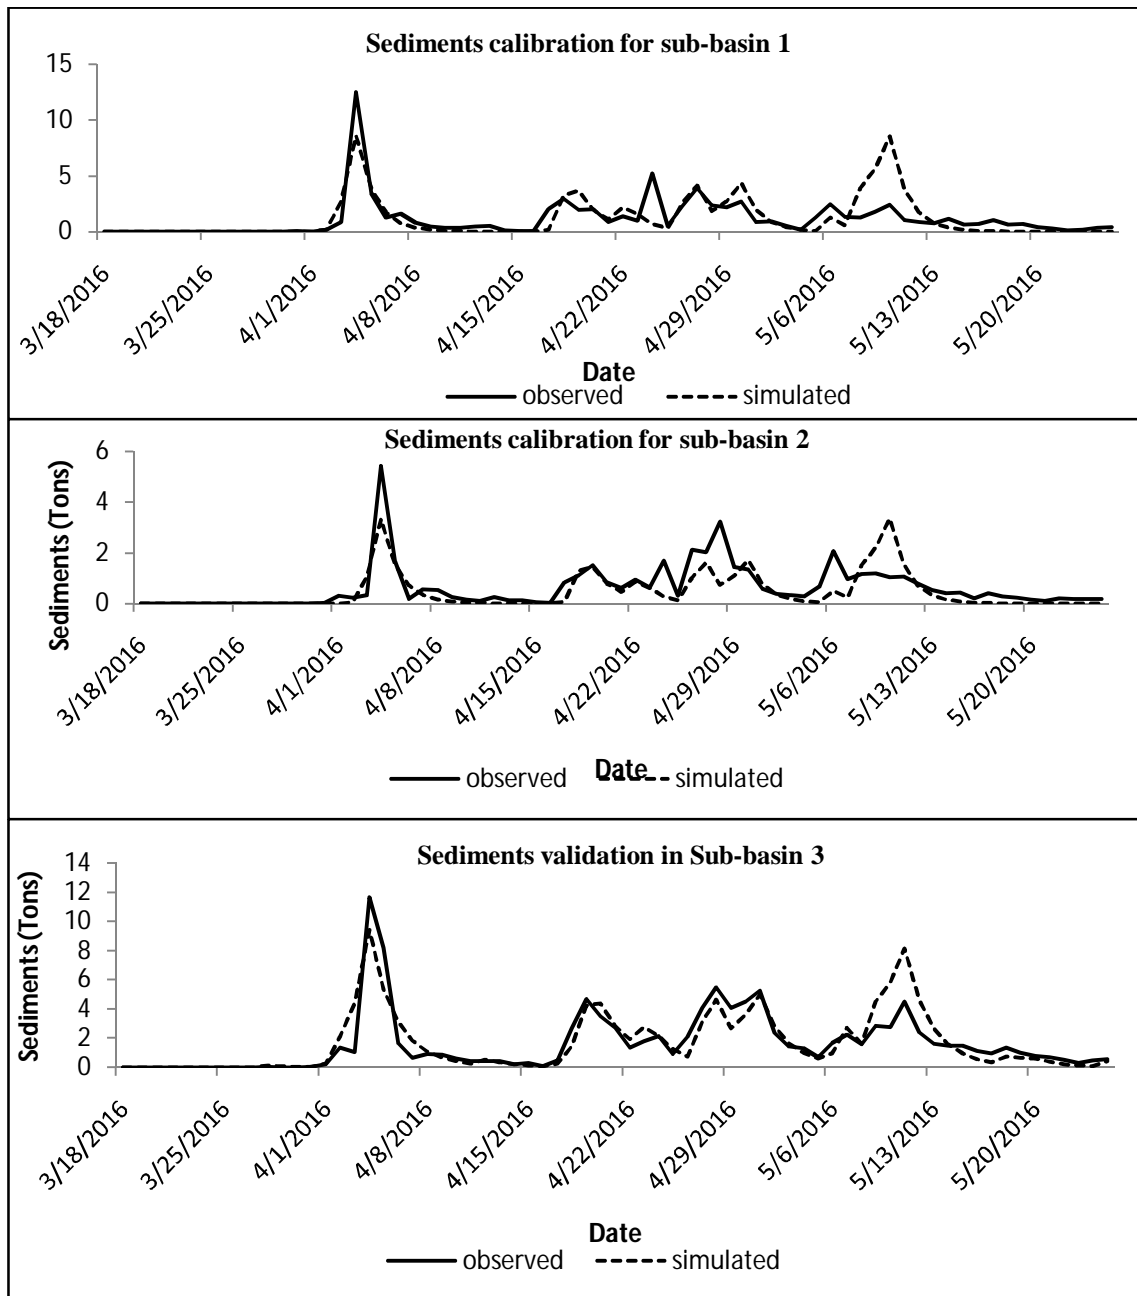

Figure 9: Sedimentations calibration and validation
